# Supplementary material for: Resveratrol inhibits androgen production of human adrenocortical H295R cells by lowering CYP17 and CYP21 expression and activities
Source: PubMed Central journal article supplement (PMC5360261; doi:10.1371/journal.pone.0174224), 2017-03-21

## S1. Original pictures of Western blots found throughout the paper.

Original Western blots to Figure 2. Representative captures are given in Figure 2B.

2B.

CYP17; 55 kDa

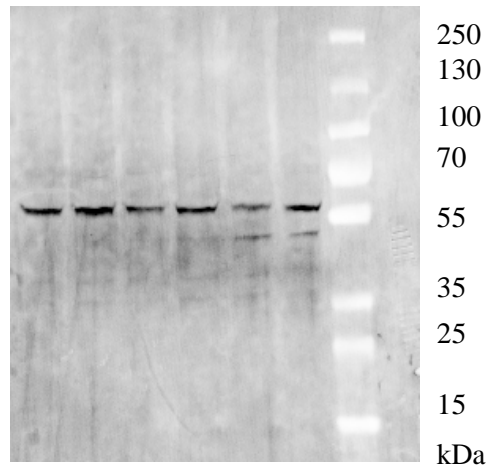

CYP21; 55 kDa

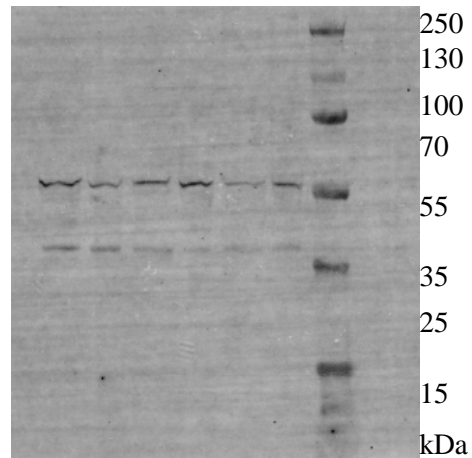

POR; 37 kDa

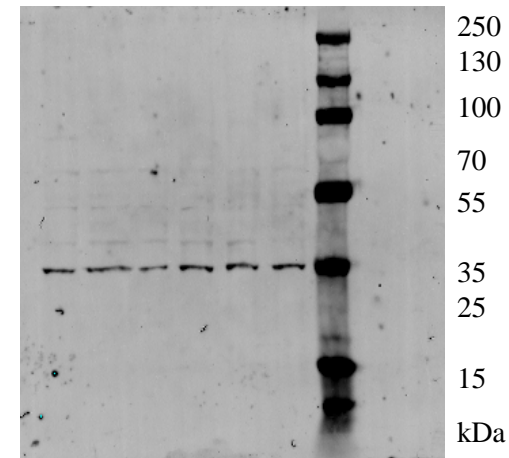

$\beta$ -actin; 42 kDa

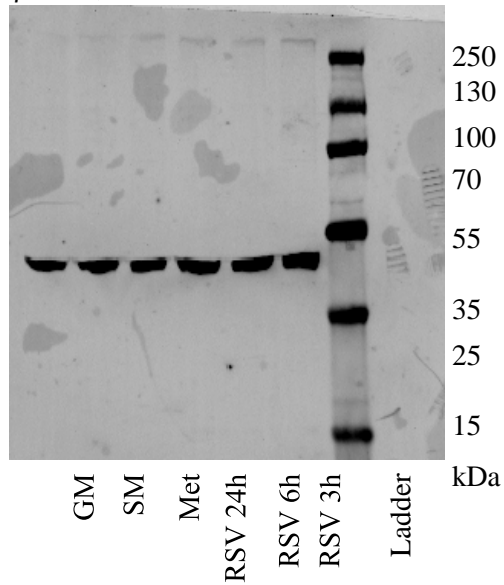

$\beta$ -actin; 42 kDa

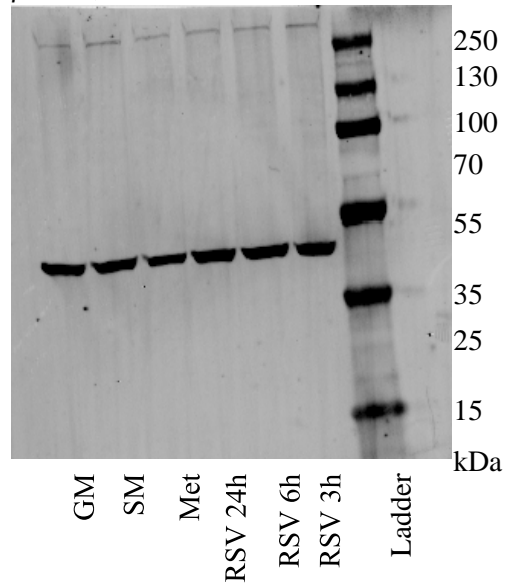

$\beta$ -actin; 42 kDa

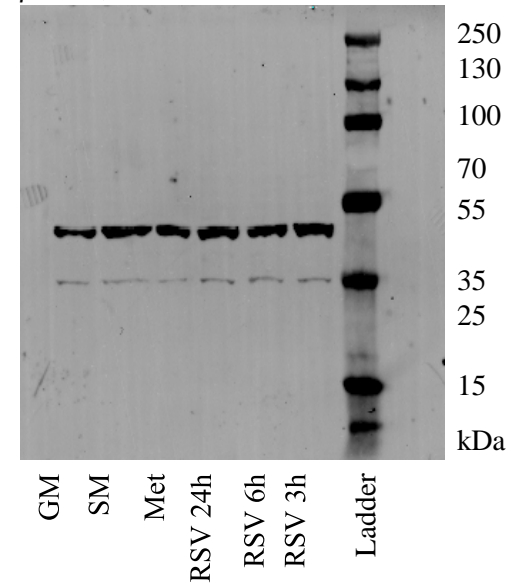

Original Western blots to Figure 3. Representative captures are given in Figure 3B.

3B. SIRT1; 110 kDa

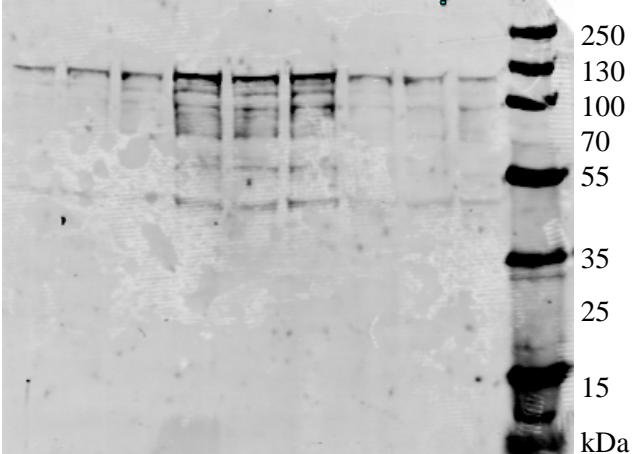

SIRT3; 35 kDa

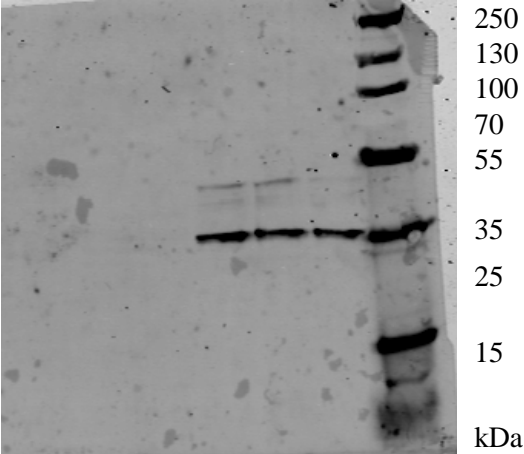

SIRT5; 33 kDa

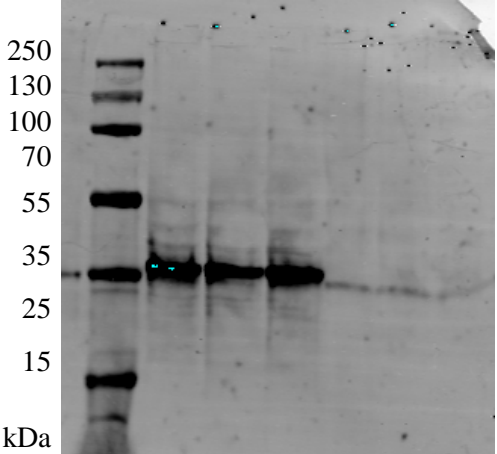

β-actin; 42 kDa

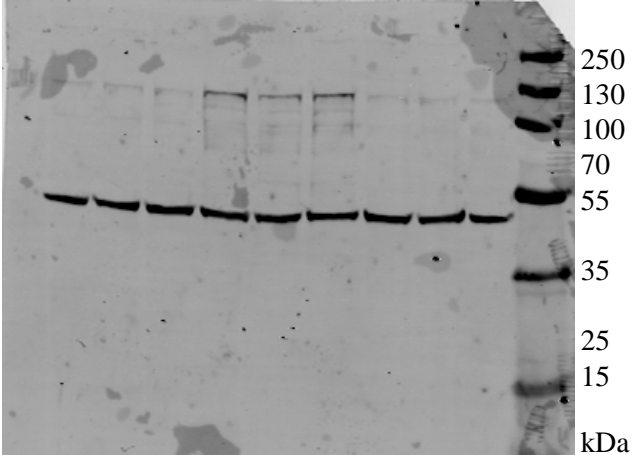

β-actin; 42 kDa

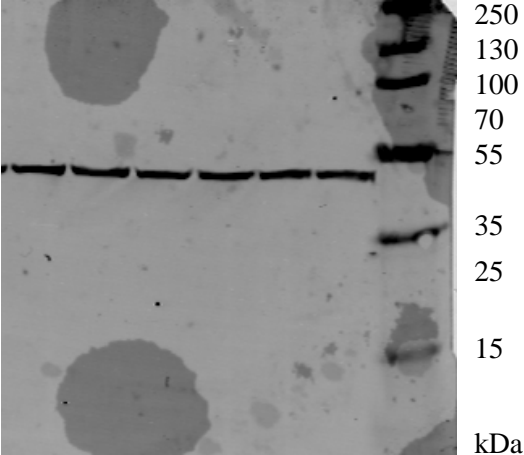

β-actin; 42 kDa

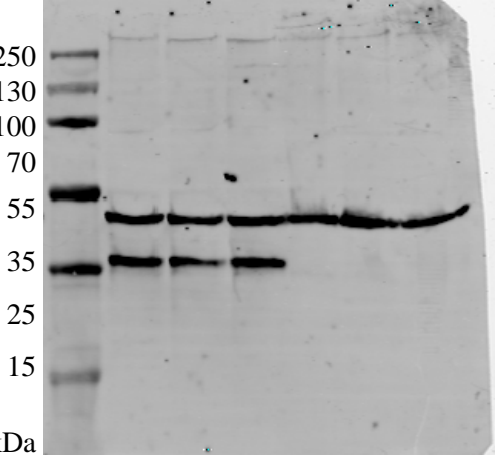

GM SM RSV GM SM RSV  
control SIRT 1

GM SM RSV GM SM RSV  
control SIRT 3

Ladder RSV SM GM RSV SM GM  
SIRT 5 control

Original Western blots to Figure 5. Representative captures are given in Figure 5A and 5B.

5A. Phosphorylated PKB; 60

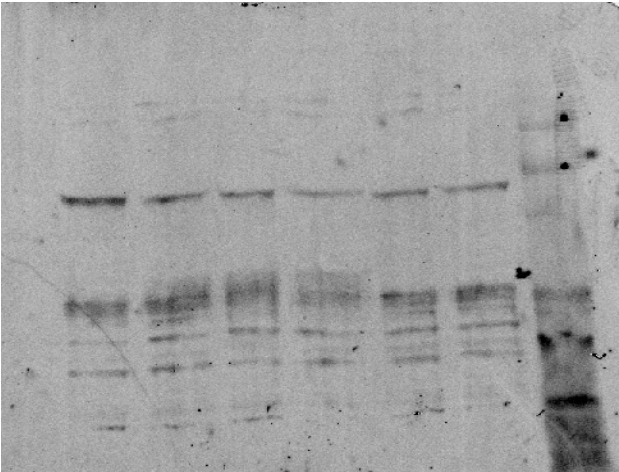

5B. Phosphorylated PKB; 60 kDa

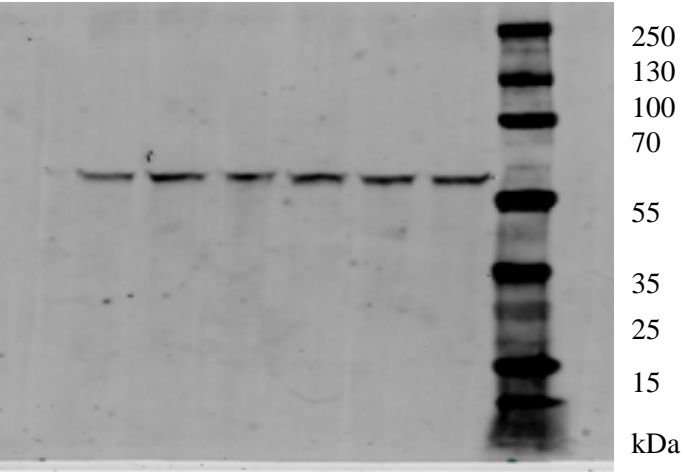

Total PKB; 60 kDa

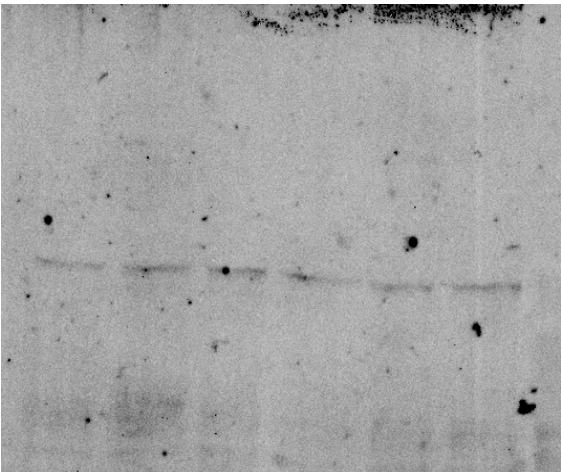

GM SM GM GM  
5uM 10uM  
RSV Metformin Ladder

Total PKB; 60 kDa

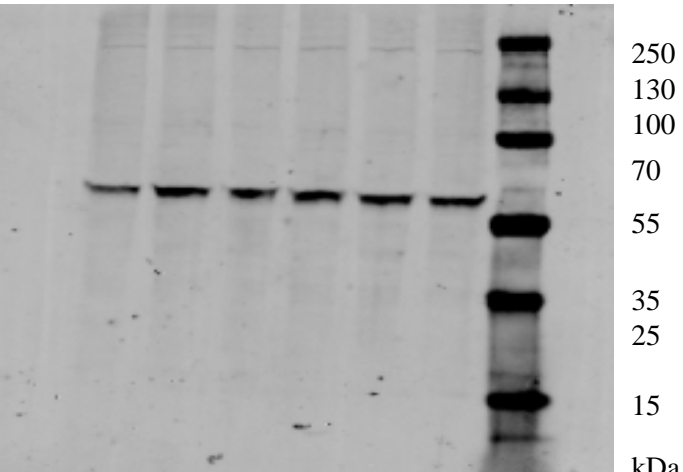

GM GM GM GM  
5uM 10uM  
RSV Metformin Ladder

Original Western blots to Figure 6. Representative captures are given in Figure 6.

6. CYP17A1; 55 kDa

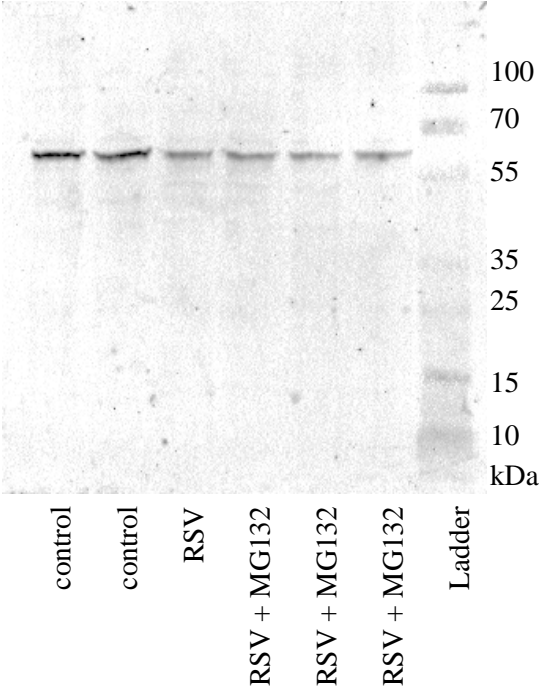

CYP21A2; 56 kDa

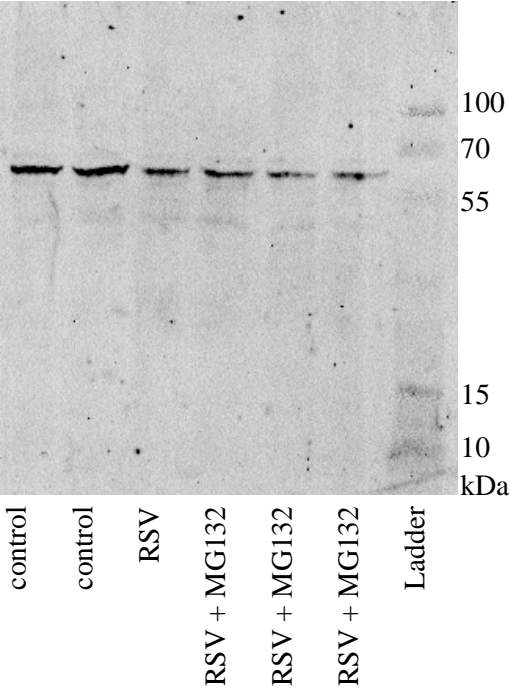

β-actin; 42 kDa

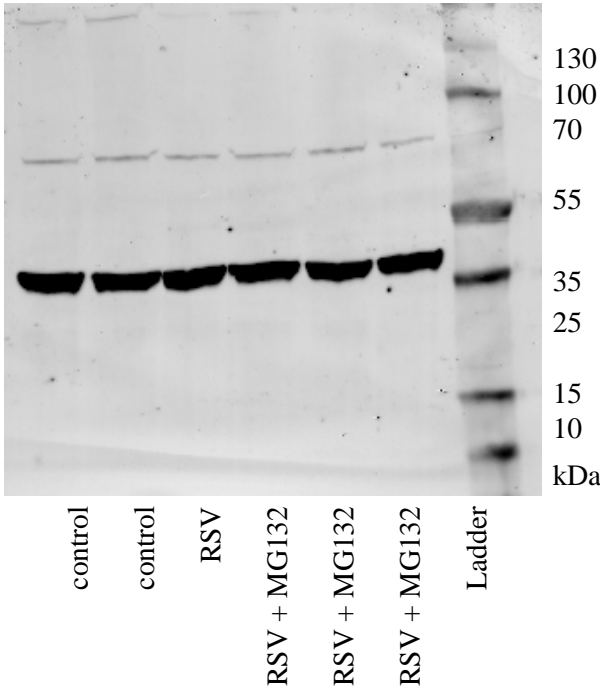

Supplement: pone.0174224.s001.pdf [file pone.0174224.s001.pdf]
